# Supplementary material for: On the proportional abundance of species: Integrating population genetics and community ecology
Source: PubMed Central journal article supplement (PMC5711905; doi:10.1038/s41598-017-17070-1), 2017-12-01
Supplement: 41598_2017_17070_MOESM1_ESM.pdf [file 41598_2017_17070_MOESM1_ESM.pdf]

## SUPPLEMENTARY INFORMATION

### On the proportional abundance of species: Integrating population genetics and community ecology

Pablo A. Marquet<sup>1,2,3,4,5,\*</sup>, Guillermo Espinoza<sup>1,6</sup>, Sebastian R.  
Abades<sup>7</sup>, Angela Ganz<sup>6</sup>, and Rolando Rebolledo<sup>6,8</sup>

<sup>1</sup>Departamento de Ecología, Facultad de Ciencias Biológicas,  
Pontificia Universidad Católica de Chile, Alameda 340 C.P. 6513677,  
Santiago, Chile

<sup>2</sup>Instituto de Ecología y Biodiversidad (IEB), Las Palmeras 3425,  
Santiago, Chile

<sup>3</sup>Instituto de Sistemas Complejos de Valparaíso (ISCV), Artillería  
470, Cerro Artillería, Valparaíso, Chile

<sup>4</sup>Laboratorio Internacional en Cambio Global (LINCGlobal) and  
Centro de Cambio Global (PUCGlobal), Pontificia Universidad  
Católica de Chile, Alameda 340 C.P. 6513677, Santiago, Chile

<sup>5</sup>The Santa Fe Institute, 1399 Hyde Park Road, Santa Fe, NM 87501,  
USA

<sup>6</sup>Centro de Análisis Estocástico y Aplicaciones, Facultad de Ingeniería  
and Facultad de Matemáticas, Pontificia Universidad Católica de  
Chile, Casilla 306, Santiago 22, Chile

<sup>7</sup>GEMA Center for Genomics, Ecology & Environment, Universidad  
Mayor, Camino La Pirámide 5750 Huechuraba, Chile

<sup>8</sup>Centro de Investigación y Modelamiento de Fenómenos Aleatorios  
(CIMFAV), Universidad de Valparaíso, Chile

\*Correspondence and requests for materials should be addressed to  
P.A.M.(email:pmarquet@bio.puc.cl)

We start by defining a general population model and its diffusion approximation. To do so, we envision the situation where an observer is able to characterize the state of an ecological system at a given scale in time and space (i.e. the focal system) by measuring several parameters, in our case the important ones are:

- $S$  or the number of species in the focal system.
- $J$  or total number of individuals in the focal system.
- $N_J(t)$  is the number of individuals of a given species during the time interval  $[0, t]$ , inside a focal community of size  $\leq J$ .

Let us now define the proportion  $X_J(t) = \frac{N_J(t)}{J}$  that corresponds to a (random) proportional abundance during  $]0, t[$ . We are interested in the behavior of this proportion when the size of the population  $J$  increases to infinity to find the law (or the *state* of the open system), when the proportions will become probabilities. This requires to rescale time  $t$  by  $J$ . Thus, for each total number of individual  $J$  we define the rescaled proportional abundance process  $Z_J(t) = \frac{N_J(Jt)}{J} = X_J(Jt)$ . According to the Neutral Theory all species are indistinguishable, so that the expected value of  $Z_J(t)$ , is  $\mathbb{E}(Z_J(t)) = \mathbb{E}(\frac{N_J(Jt)}{J})$ , and represents the proportional abundance of any species.

The dynamics of the population of a given species in the focal system will be governed by generalized birth and death events (including speciation, immigration and emigration) described by two rates  $b_J$  and  $d_J$  (birth and death of individuals), while the interaction with the environment (unobserved dynamics) is driven by a noise (a martingale). So, let  $J \geq 1$  and assume that the process  $(N_J(t), t \geq 0)$  is a birth and death process taking values in  $\{1, \dots, J\}$ .

The transition probabilities are given by

$$Q_J(x, y) = \begin{cases} B_J(x) & \text{if } y = x + 1, 0 \leq x \leq J - 1, \\ 1 - (B_J(x) + D_J(x)) & \text{if } y = x, 0 \leq x \leq J, \\ D_J(x) & \text{if } y = x - 1, 1 \leq x \leq J, \\ 0 & \text{otherwise.} \end{cases} \quad (\text{S1})$$

$X_J(t) = N_J(t)/J$  is again a jump Markov process with states in  $\{0, \frac{1}{J}, \frac{2}{J}, \dots, 1\} \subset [0, 1]$ , and we abuse the language by keeping the same notations for the transition kernel:  $Q_J(x, y) = B_J(x)$  if  $y = x + \frac{1}{J}$ ,  $x \in \{0, \frac{1}{J}, \dots, 1 - \frac{1}{J}\}$ , and so on. The dynamics of this process  $X_J$  is typically open: it concerns a main-system part defined by an observable like the evolution rate of  $X_J$ ; and a noisy part which represents the interaction of this system with the environment.

From the mathematical point of view,  $X_J$  can be decomposed as follows:

$$X_J(t) = X_J(0) + \widetilde{X}_J(t) + M_J(t), \quad (\text{S2})$$

where  $\widetilde{X}_J$  is the observable process (*predictable*, in mathematical terms), and  $M_J$  is the noise process (a *martingale*).

The process  $\widetilde{X}_J$  is easily computed by means of the Markov property of  $X_J$  (see (1)). That requires to introduce the filtration or history induced by  $X_J$ , given roughly by  $\mathcal{F}_t^J$  obtained from  $\sigma(X_J(s); 0 \leq s \leq t)$  by customary Dellacherie procedure for all  $t \geq 0$ . We assume further that we choose a nice version of  $X_J$ , that is right-hand continuous with left-hand limits. As a result, given any measurable function  $f$  defined on  $[0, 1]$ , the predictable compensator  $\widetilde{f \circ X}_J(t)$  of  $f \circ X_J(t) = f(X_J(t))$  is given by

$$\begin{aligned} \widetilde{f \circ X}_J(t) = & \\ & \int_0^t B_J(X_J(s-)) \left( f(X_J(s-) + \frac{1}{J}) - f(X_J(s-)) \right) ds \\ & + \int_0^t D_J(X_J(s-)) \left( f(X_J(s-) - \frac{1}{J}) - f(X_J(s-)) \right) ds. \end{aligned} \quad (\text{S3})$$

So that, if one applies the above formula to the identity function in  $[0, 1]$ , one obtains:

$$\widetilde{X}_J(t) = \frac{1}{J} \int_0^t (B_J(X_J(s-)) - D_J(X_J(s-))) ds. \quad (\text{S4})$$

This gives the main dynamics for the proportion of living individuals in the population of size  $J$ .

The noise is (trivially) given by

$$M_J(t) = X_J(t) - \frac{1}{J} \int_0^t (B_J(X_J(s-)) - D_J(X_J(s-))) ds. \quad (\text{S5})$$

However, the important characteristics of this noise is provided by its “energy dissipation”, which is the increasing process  $\langle M_J, M_J \rangle$  such that  $M_J^2 - \langle M_J, M_J \rangle$  is a martingale (or the predictable compensator of the square of the noise, which is an observable quantity). Using again the Markov property one finds

$$\langle M_J, M_J \rangle(t) = \frac{1}{J^2} \int_0^t (B_J(X_J(s-)) + D_J(X_J(s-))) ds. \quad (\text{S6})$$

The two processes (S4) and (S6) are essential to understand the approximation of the dynamics by a diffusion when  $J \rightarrow \infty$  and one considers a large time scale ( $Jt$  instead of  $t$ ).

Let define  $Z_J(t) = X_J(Jt)$ . Therefore, after an elementary change of variables ( $u = s/J$ ) in (S4), we obtain the predictable compensator of  $Z_J$  as

$$\begin{aligned} \widetilde{Z}_J(t) &= \frac{1}{J} \int_0^{Jt} (B_J(X_J(s-)) - D_J(X_J(s-))) ds \\ &= \int_0^t (B_J(Z_J(u-)) - D_J(Z_J(u-))) du. \end{aligned}$$

Analogously, in (S6) the new time scale yields

$$\langle M_J, M_J \rangle(Jt) = \frac{1}{J} \int_0^t (B_J(Z_J(u-)) + D_J(Z_J(u-))) du.$$

**Theorem 1** Define  $Z_J(t) = X_J(Jt)$ , for all  $J \geq 1$  and  $t \geq 0$ . Assume  $Z_J(0) = z \in [0, 1]$  fixed, and that there exists two continuous functions  $\beta, \sigma : [0, 1] \rightarrow \mathbb{R}$ , with  $\sigma(x) > 0$ , for all  $x \in ]0, 1[$ ,  $\beta \in C^1(]0, 1[)$ ,  $\sigma \in C^2(]0, 1[)$ , such that they satisfy in addition the two following hypotheses:

(H1) For all  $T > 0$ ,  $\sup_{t \in [0, T]} |(B_J(Z_J(t-)) - D_J(Z_J(t-))) - \beta(Z_J(t-))| \rightarrow 0$  in probability;

(H2) For all  $T > 0$ ,  $\sup_{t \in [0, T]} |\frac{1}{J}(B_J(Z_J(t-)) + D_J(Z_J(t-))) - \sigma^2(Z_J(t-))| \rightarrow 0$  in probability, as  $J \rightarrow \infty$ .

Then, the process  $Z_J$  converges in distribution towards a diffusion process  $Z$  which can be represented as

$$Z(t) = Z(0) + \int_0^t \beta(Z(s)) ds + \int_0^t \sigma(Z(s)) dW_s, \quad (t \geq 0). \quad (S7)$$

Moreover,  $Z(t) \in [0, 1]$  with probability 1 for all  $t \geq 0$ .  $Z$  is a Feller process and its semigroup  $(T_t)_{t \geq 0}$  acting on  $C([0, 1])$  has a generator  $L$  given by

$$Lf(x) = \frac{1}{2} \sigma^2(x) \frac{d^2}{dx^2} f(x) + \beta(x) \frac{d}{dx} f(x), \quad (x \in \mathbb{R}), \quad (S8)$$

for any  $f \in C^2(]0, 1[) \cap C([0, 1])$  such that  $f(0) = f(1) = 0$ . As a result, the dual semigroup  $(T_t^*)_{t \geq 0}$  leaves the space  $L^1([0, 1])$  invariant, so that, in particular, given any probability density  $\rho$  on  $[0, 1]$ , its evolution  $\rho_t = T_t^* \rho$  satisfies the Chapman-Kolmogorov (or Master Equation),

$$\frac{\partial \rho_t(x)}{\partial t} = L^* \rho_t(x) = \frac{1}{2} \frac{d^2}{dx^2} (\sigma^2(x) \rho_t(x)) - \frac{d}{dx} (\beta(x) \rho_t(x)). \quad (S9)$$

*Proof.* This theorem is a direct consequence of Proposition III.2.4, pages 92-93 in (2) (see also a more general result in (3)).

One notes first that the process  $Z_J$  with states in  $[0, 1]$  almost surely, has vanishing jumps if  $J \rightarrow \infty$ , since  $\sup_t |\Delta Z_J(t)| \leq 1/J$ . Thus the first hypothesis in (2) Proposition III.2.4, is satisfied.

In addition, given  $T > 0$ , it holds that

$$\begin{aligned} & \sup_{t \leq T} \left| \int_0^t (B_J(Z_J(s-)) - D_J(Z_J(s-))) ds - \int_0^t \beta(Z_J(s)) ds \right| \\ & \leq T \sup_{t \in [0, T]} |(B_J(Z_J(t-)) - D_J(Z_J(t-))) - \beta(Z_J(t-))|. \end{aligned}$$

Similarly,

$$\begin{aligned} & \sup_{t \leq T} \left| \frac{1}{J} \int_0^t (B_J(Z_J(s-)) + D_J(Z_J(s-))) ds - \int_0^t \sigma^2(Z_J(s)) ds \right| \\ & \leq T \sup_{t \in [0, T]} \left| \frac{1}{J} (B_J(Z_J(t-)) + D_J(Z_J(t-))) - \sigma^2(Z_J(t-)) \right| \end{aligned}$$

So that, in both previous inequalities the left-hand terms converge to 0 in probability as  $J \rightarrow \infty$  due to (H1) and (H2).

Moreover, the hypotheses on  $\beta$  and  $\sigma$  imply that there is a unique solution in distribution to the equation (S7) (see for instance (4), Corollary 4.29 and Theorem 5.7). As a result, Proposition III.2.4 in (2) fully applies. So that, the convergence to the diffusion  $Z$  is proved. Moreover, since  $\mathbb{P}(Z_J(t) \in [0, 1]) = 1$ , the convergence in distribution implies that  $1 = \limsup \mathbb{P}(Z_J(t) \in [0, 1]) \leq \mathbb{P}(Z(t) \in [0, 1]) \leq 1$ , thus  $Z(t) \in [0, 1]$  for all  $t \geq 0$ , almost surely.

Finally, the coefficients  $\beta$  and  $\sigma$  of the diffusion are bounded, with bounded derivatives, so that, the generator  $L$  applies each function of its core  $C_c^2([0, 1])$  into an element of the Banach space  $C([0, 1])$ . Therefore, by a density argument,  $T_t$  maps  $C([0, 1])$  into itself and it is norm-continuous. As a result, the semigroup is of Feller type. Any integrable function of class  $C^2([0, 1])$  is transformed by  $L^*$  into an element of  $L^1([0, 1])$ , by a density argument again,  $T_t^*(L^1([0, 1])) \subset L^1([0, 1])$ , for all  $t \geq 0$ , finishing the proof.  $\square$

It is worth noticing that the convergence in distribution mentioned in the above theorem, means the convergence of the sequence of laws of the processes on the space of their trajectories. As a result, any continuous functional  $F(Z_J)$  of the trajectory of  $Z_J$  converges in distribution to  $F(Z)$ .

**Corollary 1** *Consider the sequences  $B_J$  and  $D_J$  given by equations (5) and (6) in the main text, where the functions  $b_J, d_J \in C^1([0, 1])$  and  $c_J \in C^2([0, 1])$  satisfy equations (7) and (8) in the main text.*

*Then,  $Z_J$  converges in distribution to a diffusion  $Z$  represented as*

$$Z(t) = z + \int_0^t (b(Z(s)) - d(Z(s))) ds + \int_0^t \sqrt{2c(Z(s))} dW_s. \quad (\text{S10})$$

*Proof.* Define  $\beta(x) = b(x) - d(x)$ , where  $b$  and  $d$  are given by (7) in the main text. Similarly, define  $\sigma^2(x) = 2c(x)$ , where  $c$  is obtained from (8) in the main text. A simple computation yields,

$$B_J(x) - D_J(x) = \beta(x),$$

for all  $x \in [0, 1]$ , so that (H1) is trivially satisfied. Moreover,

$$\frac{B_J(x) + D_J(x)}{J} = \frac{1}{J} (b_J(x) + d_J(x) + 2c_J(x)).$$

Since  $b_J$  and  $d_J$  are bounded,  $\lim_J \frac{1}{J}(b_J(x) + d_J(x)) = 0$ . And equation (8) in the main text implies that

$$\frac{B_J(x) + D_J(x)}{J} \rightarrow \sigma^2(x) = 2c(x),$$

as  $J \rightarrow \infty$ , uniformly in  $x \in [0, 1]$ . This implies in particular (H2) and the proof is complete.  $\square$

It is worth noticing that the distribution  $P_t$  of  $Z(t)$  represents the **state** of the open ecological system at time  $t$ . This state has a density  $\rho_t$ , that is  $P_t(dx) = \rho_t(x)dx$ , and it can be obtained from the process  $Z(t)$  as follows:  $P_t(Z(t) \in ]a, b])$  is the limit of the frequency of trajectories of the process  $Z(t)$  visiting the interval  $]a, b]$ . So that, these frequencies can be obtained by simulating the solutions to (S10).

### Derivation of the Beta distribution

The invariant density distribution of  $Z(t)$  is the solution of the equation (11) in the main text. The choice of  $b$ ,  $d$ ,  $c$  according to equations (12), (13), (14) in the main text

yields

$$\gamma \frac{\partial^2}{\partial x^2} (x(1-x)\rho_\infty(x)) - \frac{\partial}{\partial x} ((b_0 - d_0) + (b_1 - d_1)x\rho_\infty(x)) = 0.$$

Noticing that  $b_0 - d_0 = \alpha\gamma$  and  $b_1 - d_1 = (\beta - \alpha)\gamma$ , the above equation is equivalent to

$$\frac{\partial^2}{\partial x^2} (x(1-x)\rho_\infty(x)) - \frac{\partial}{\partial x} (\alpha + ((\beta - \alpha)x\rho_\infty(x))) = 0. \quad (\text{S11})$$

A straightforward computation shows that any function of the form

$$x \mapsto Cx^{\alpha-1}(1-x)^{\beta-1}$$

solves (S11). So that, choosing  $C = 1/B(\alpha, \beta)$  (normalization constant) one obtains the unique solution  $\rho_\infty(x)$  of (S11) which is a probability density on the real line.

In particular, the choice of coefficients (21), (22), (23) (see main text), with  $p = 1/S$ , leads to

$$\rho_\infty(x) = \frac{1}{B(\alpha, \alpha(S-1))} x^{\alpha-1} (1-x)^{\alpha(S-1)-1}, \quad (\text{S12})$$

where  $\alpha = \frac{m}{S\lambda(1-m)}$  and  $B(\alpha, \alpha(S-1)) = \int_0^1 x^{\alpha-1} (1-x)^{\alpha(S-1)-1}$ .

**Remark.** Under the neutrality hypothesis, the number of living individuals  $N^i(t)$  of the species  $i$  have the same probability distribution at time  $t \geq 0$ , for  $i = 1, \dots, S$

and these variables are independent. So that, let denote by  $N(t)$  any of the above variables. Since  $0 \leq Z_J(t) = N(tJ)/J \leq 1$  for all  $t \geq 0$ , the sequence  $(Z_J(t))_{J \in \mathbb{N}}$  is uniformly integrable for all  $t$ . Therefore, the convergence in distribution of  $Z_J$  to  $Z$  yields

$$\lim_{J \rightarrow \infty} \left[ \mathbb{E} \left( \frac{N(tJ)}{J} \right) \right] = \mathbb{E}(Z(t)) = \int_0^1 x \rho_t(x) dx, \quad (\text{S13})$$

where  $\rho_t$  is the solution to the Master Equation. Also, under the Neutrality Hypothesis one has the following approach to compute the probability of finding a species with  $n$  individuals at time  $tJ$ .

$$\begin{aligned} p_{n,J} &= \mathbb{P}(N_J(tJ) = n) \\ &= \mathbb{P}(n \leq N_J(tJ) < n+1) \\ &= \mathbb{P} \left( \frac{n}{J} \leq \frac{N_J(tJ)}{J} < \frac{n+1}{J} \right) \\ &= \mathbb{P} \left( \frac{n}{J} \leq Z_J(t) < \frac{n+1}{J} \right). \end{aligned} \quad (\text{S14})$$

For  $J$  large enough,  $\mathbb{P} \left( \frac{n}{J} \leq Z_J(t) < \frac{n+1}{J} \right)$  is approached by  $\mathbb{P} \left( \frac{n}{J} \leq Z(t) < \frac{n+1}{J} \right)$ , and then letting  $t \rightarrow \infty$ , the above expression becomes equivalent to

$$\int_{\frac{n}{J}}^{\frac{n+1}{J}} \frac{1}{B(\alpha, \alpha(S-1))} x^{\alpha-1} (1-x)^{\alpha(S-1)-1} dx. \quad (\text{S15})$$

And, similarly,

$$\lim_{t \rightarrow \infty} \lim_{J \rightarrow \infty} \mathbb{E} \left( \frac{N_J(tJ)}{J} \right) = \int_0^1 \frac{1}{B(\alpha, \alpha(S-1))} x^{\alpha} (1-x)^{\alpha(S-1)-1} dx. \quad (\text{S16})$$

Finally, as it has been the tradition in neutral theory we can derive the typical species abundance distribution (SAD), or expected number of species having  $n$  individuals in the focal community. That is, the probability of occurrence of that event is given by (S14). Since the species are independent and identical, we have a binomial distribution with parameters  $(S, p_{n,J})$ , so that its mean value is simply  $S p_{n,J}$ . Therefore, it can be approached for  $J$  large enough by

$$S \mathbb{P} \left( \frac{n}{J} \leq Z(t) < \frac{n+1}{J} \right),$$

and letting  $t \rightarrow \infty$  this is asymptotically equivalent to

$$S \int_{\frac{n}{J}}^{\frac{n+1}{J}} \frac{1}{B(\alpha, \alpha(S-1))} x^{\alpha-1} (1-x)^{\alpha(S-1)-1} dx, \quad (\text{S17})$$

which is our approximation to the SAD  $\langle \phi_n \rangle$ . That is

$$\langle \phi_n \rangle \sim \frac{S}{JB(\alpha, \alpha(S-1))} \left( \frac{n}{J} \right)^{\alpha-1} \left( 1 - \left( \frac{n}{J} \right) \right)^{\alpha(S-1)-1} \quad (\text{S18})$$

Table S 1: Fit of the discrete Beta distribution (eqn. 28) to fifteen plant and animal communities. Data for communities 1-6 comes from (5), 7-9 from (6) 10 from (7), 11-12 from (8) and 13-15 from (9). The estimation of  $\alpha$  and  $\beta$  was done by optimisation based on the Nelder-Mead method implemented in the maximum likelihood function `mle2`, included in library `bbmle` for R. For each community, the Volkov model was simulated using function `volkov` included in library `untb` for R. Observed richness (S) and total abundance (J) were directly calculated from data and passed to the function as arguments. On the other hand, parameters  $\theta$  and  $m$  required by this function were estimated using software *tetame* (10, 11). Comparison between observed and predicted frequency distribution were done using Pearson's correlation (P).

| Community                    | S    | J     | $\alpha$ | $\beta$  | $P_{beta}$ | $P_{Volkov}$ |
|------------------------------|------|-------|----------|----------|------------|--------------|
| 1 Sinharaja                  | 167  | 16936 | 0.2498   | 41.4681  | 0.915      | 0.931        |
| 2 Pasoh                      | 678  | 26554 | 0.3868   | 261.8361 | 0.978      | 0.980        |
| 3 Korup                      | 308  | 24591 | 0.2783   | 85.4508  | 0.945      | 0.947        |
| 4 Yasuni                     | 821  | 17546 | 0.4872   | 399.4592 | 0.967      | 0.967        |
| 5 Lambir                     | 1004 | 33175 | 0.4290   | 430.3299 | 0.987      | 0.988        |
| 6 Barro Colorado Island      | 225  | 21457 | 0.2773   | 62.1195  | 0.897      | 0.897        |
| 7 Hangklip                   | 247  | 23756 | 0.2538   | 62.4335  | 0.927      | 0.361        |
| 8 Cederberg                  | 247  | 11561 | 0.3025   | 74.4123  | 0.849      | 0.899        |
| 9 Zuurberg                   | 114  | 8806  | 0.3709   | 41.9154  | 0.415      | 0.409        |
| 10 Terborgh                  | 245  | 1663  | 0.9877   | 493.8225 | 0.854      | 0.948        |
| 11 Fisher Butterflies        | 501  | 3306  | 0.9877   | 493.8225 | 0.891      | 0.986        |
| 12 Fisher Lepidoptera        | 180  | 2020  | 0.6976   | 124.8675 | 0.905      | 0.950        |
| 13 Dornelas Indo Pacific     | 450  | 3779  | 0.6427   | 288.5521 | 0.840      | 0.903        |
| 14 Dornelas Papua New Guinea | 403  | 2520  | 0.8557   | 344.0041 | 0.864      | 0.939        |
| 15 Dornelas Solomon Islands  | 268  | 1201  | 1.1268   | 300.8495 | 0.834      | 0.940        |



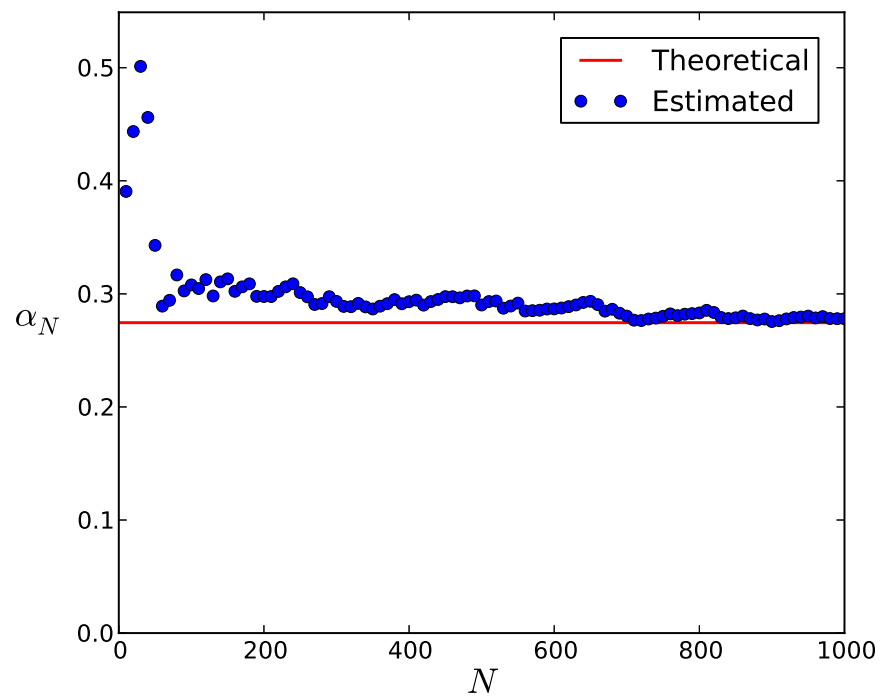

Figure S 1: Estimation of the alpha parameter of the Beta distribution Eq. (27) in the main text, using different number of trajectories of the stochastic process  $Z(t)$  from Eq.(24) in the main text

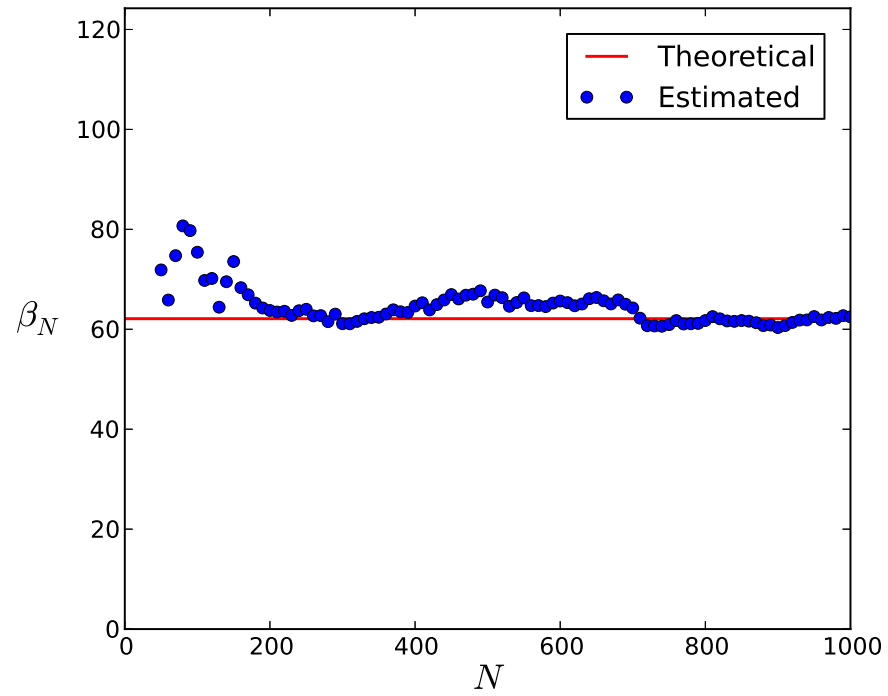

Figure S 2: Estimation of the beta parameter of the Beta distribution Eq. (27) in the main text, using different number of trajectories of the stochastic process  $Z(t)$  from Eq.(24) in the main text

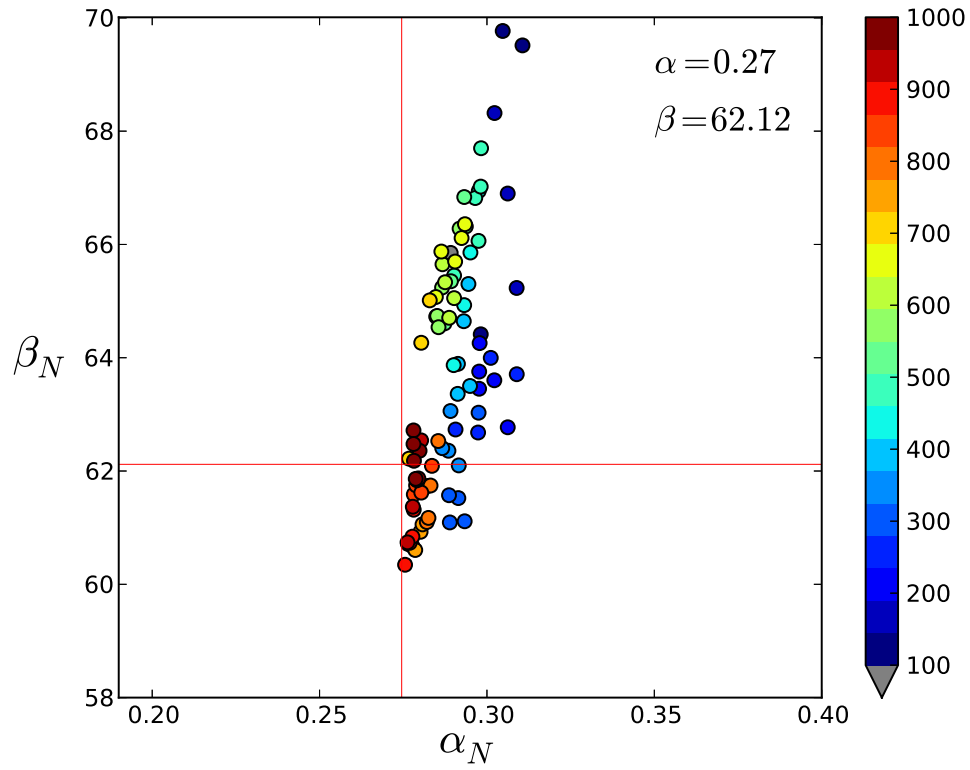

Figure S 3: Bivariate representation of the estimated values of  $\alpha$  and  $\beta$  using different number of trajectories as explained in Figures S1,2

## References

1. Brémaud P (1981) *Point processes and queues: martingale dynamics*. (Springer-Verlag, New York).
2. Rebolledo R (1979) La méthode des martingales appliquée à l'étude de la convergence en loi de processus. *Bulletin of the SMF. Mémoires*, 62:129p.
3. Rebolledo R (1980) Sur l'existence de solutions à certains problèmes de semi-martingales. *C. R. Acad. Sci. Paris Sér. A-B*, 290:A843-A846.
4. Karatzas I, Shreve S (2012) *Brownian motion and stochastic calculus*. Springer Science and Business Media.
5. Volkov I, Banavar JR, He F, Hubbell SP, Maritan A (2005) Density dependence explains tree species abundance and diversity in tropical forests. *Nature* 438: 658-661.
6. Latimer AM, Silander JA, Cowling RM (2005) Neutral ecological theory reveals isolation and rapid speciation in a biodiversity hot spot. *Science* 309: 1722-1725.
7. Terborgh J, Robinson SK, Parker III TA, Munn CA, Pierpont N (1990) Structure and organization of an Amazonian forest bird community. *Ecological Monographs* 60: 213-238.
8. Fisher RA, Corbet AS, Williams CB (1943) The relation between the number of species and the number of individuals in a random sample of an animal population. *J Anim Ecol* 12: 42-58.
9. Dornelas M, Connolly SR, Hughes TP (2006) Coral reef diversity refutes the neutral theory of biodiversity. *Nature* 440: 80-82.
10. Chave J, Alonso D, Etienne, RS. (2006). Comparing models of species abundance. *Nature* 441: E1.
11. Jabot F, Etienne, RS, Chave J. (2008). Reconciling neutral community models and environmental filtering: theory and an empirical test. *Oikos* 117: 1308-132.
